# Supplementary material for: CXCR5 guides migration and tumor eradication of anti-EGFR chimeric antigen receptor T cells
Source: PubMed Central journal article supplement (PMC8433065; doi:10.1016/j.omto.2021.07.003), 2021-07-16
Supplement: mmc1.pdf [file mmc1.pdf]

**OMTO, Volume 22**

**Supplemental information**

**CXCR5 guides migration and tumor eradication  
of anti-EGFR chimeric antigen receptor T cells**

**Guangchao Li, Jintao Guo, Yanfang Zheng, Wen Ding, Zheping Han, Lingyu Qin, Wenjun Mo, and Min Luo**

## Supplementary Figure 1

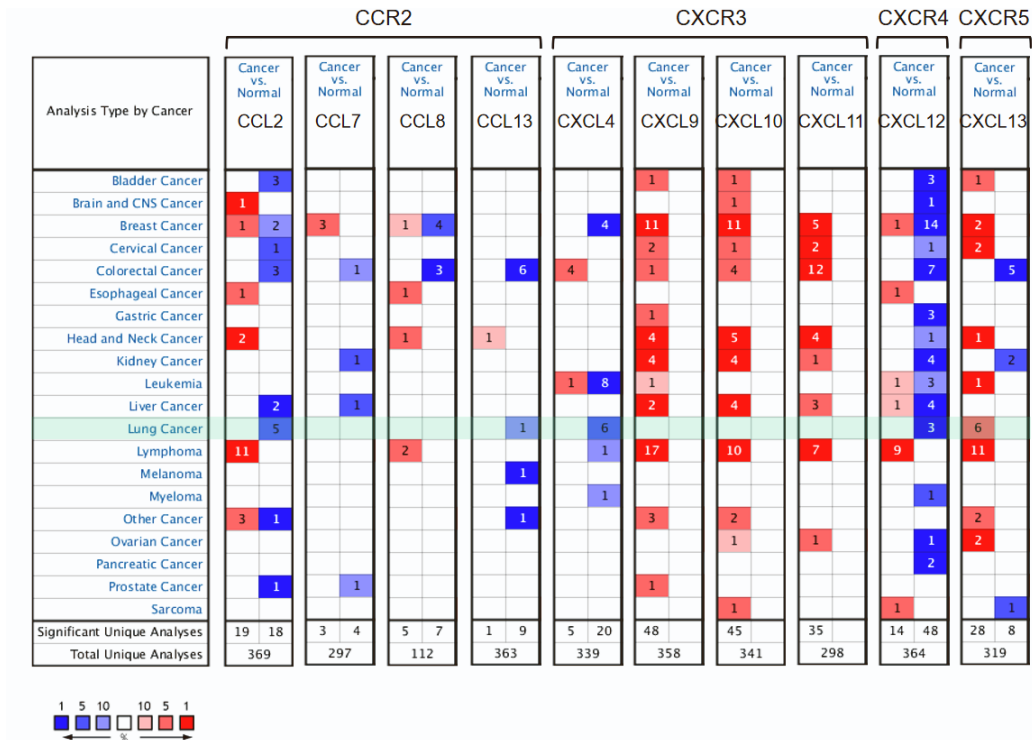

**Figure S1. The expressions of multiple chemokines in the normal and lung cancer.**

The mRNA expression levels of chemokines in various cancers were analyzed using the online Oncomine database (Threshold for FC>2, p<0.05, and rank=top10).

## Supplementary Figure 2

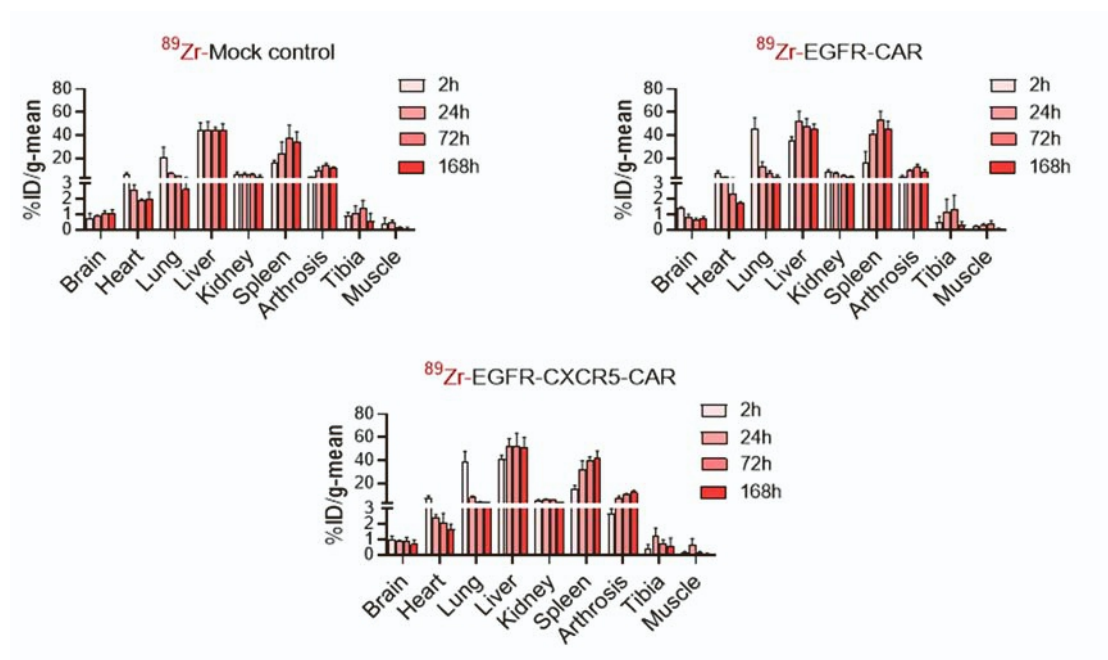

**Figure S2. Micro PET/CT analysis of the <sup>89</sup>Zr-Oxine labeled CAR-T cells tracking in vivo.**

After a single intravenous injection of <sup>89</sup>Zr-CAR-T cells in tumor-bearing mice, a small animal PET/CT scan was performed to delineate the regions of interest and obtain the radiation uptake values to study the tissue distribution characteristics of CAR-T cells. Radio-isotopes were imaged on tumor bearing mice over 7 days (n=3).
